# Supplementary material for: Molecular Evolution and Functional Divergence of Trace Amine–Associated Receptors
Source: PubMed Central journal article supplement (PMC4786312; doi:10.1371/journal.pone.0151023), 2016-03-10
Supplement: pone.0151023.s003.pdf [file pone.0151023.s003.pdf]

**>shark TAAR S1a**

LCYESVNGSCPRAIRSTGVRITLYLLAVLAILVTLFGNMLVIISIAHFKQLHTPTNYLVF  
SLAIADFLGCIVMPYSLIRSIESCWYFGILFCKLHTSFDLVLCAASIIHLCCISVDRYY  
AVCDPLKYKTTITVSTVLIMICLSWALSFLVGFVIFLELHLIEIKDFYYHEIACFGGCT  
LMMGKVCALVYSTISFYFPAFIMVCIYTKIYLVAKKQARTINNLSRKVQPINEGNSIASQ  
RSERKAAKTLGIVMGVFILCWSPYFVCDSIEPFIKYSTPPVLFDAFFWVGYL**NSTFNPMI**  
**YGFYSWE**RKALKIILTCKIFAPDSSRINLF

**>shark TAAR S2a**

MNSINLENSDLQYCFEENMSCPKSIRSTTTTTVTMYIFITISIVITILGNSVVMISILHF  
KQLQTPNTNYLVLSLAFVDFLMGFFVLPFSMVRSVETCWYFGDTFCDIHSTLDVVLTTVSI  
YNLCFIAIDRYAVCEPLLYSIKMTLPMTALIIITLNWLFIIYGSCVFLSEFTKKASGHY  
RTTISCKGSCIEYRFGGHMDALIVLFIPTFIILGIYLLKIYFVQRKHARKIGNMPNNINSK  
EEINVRVLQTKKTAANKQGVVMGIFVLSWLPFYLSSIINPYLNFATPPILFEAFTWFGF  
**FNSAFNPVLYAFFYPWE**RTALKSILTCQILRPESIMNLFPE

**S3 Fig. TAAR signature motifs found in the two elephant shark (*Callorhinchus milii*) TAAR protein sequences.** The TAAR motif regions are highlighted with yellow. The seven transmembrane regions predicted by Phobius (Kall *et al.*, 2007) are indicated with underline.

**Reference:**

Kall L, Krogh A, Sonnhammer ELL. 2007. Advantages of combined transmembrane topology and signal peptide prediction-the Phobius web server. *Nucleic Acids Res.* 35:W429-432.
