# Supplementary material for: Molecular Evolution and Functional Divergence of Trace Amine–Associated Receptors
Source: PubMed Central journal article supplement (PMC4786312; doi:10.1371/journal.pone.0151023), 2016-03-10
Supplement: pone.0151023.s004.pdf [file pone.0151023.s004.pdf]

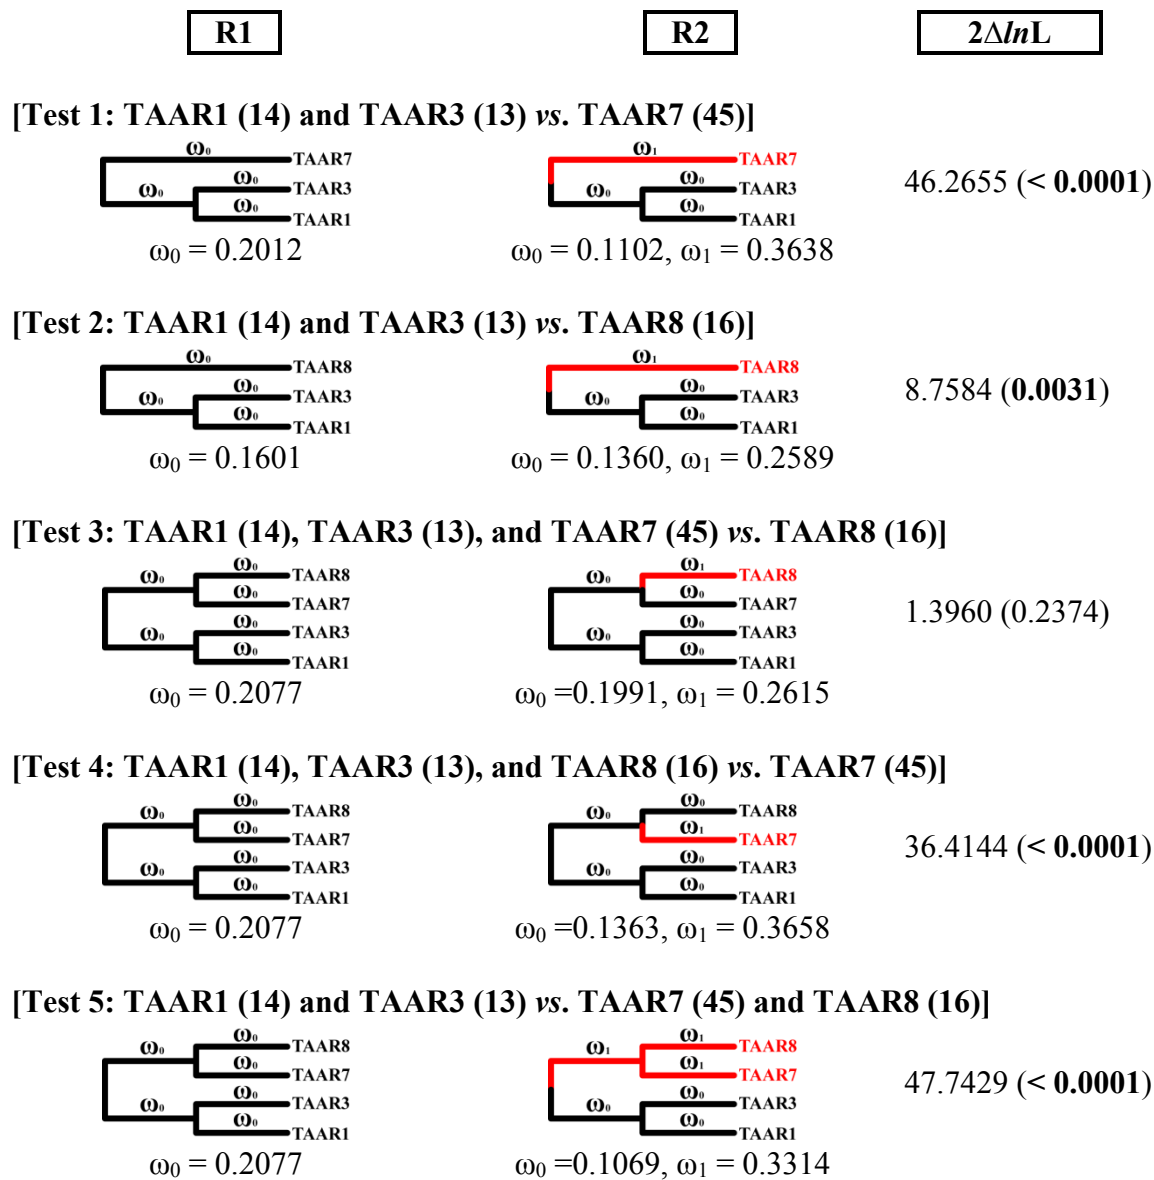

**S4 Fig. PAML branch-model tests between primary amine detecting TAARs (TAAR1 and TAAR3) and tertiary amine detecting TAARs (TAAR7 and TAAR8).** All tests were performed comparing the two hypotheses: R1 (a single  $\omega$  for all branches) and R2 (two independent  $\omega$ 's:  $\omega_1$  for the red lineage and  $\omega_0$  for the black lineages). The number of the genes included in each TAAR subfamily is given in parentheses after the subfamily name. For the likelihood ratio test statistics,  $2\Delta\ln L$ ,  $P$ -values (shown in parentheses) are obtained based on a  $\chi^2$  distribution with d.f. = 1. Significant  $P$ -values (< 0.05) are shown in boldfaces.
