# Supplementary material for: Molecular Evolution and Functional Divergence of Trace Amine–Associated Receptors
Source: PubMed Central journal article supplement (PMC4786312; doi:10.1371/journal.pone.0151023), 2016-03-10
Supplement: pone.0151023.s008.pdf [file pone.0151023.s008.pdf]

**S1 Table. The animal genomes used in this study.**

| Group/species                   | Order              | Sources <sup>a</sup> | Coverage or version | Number of OR genes <sup>b</sup> | Number of TAAR genes <sup>b</sup> |
|---------------------------------|--------------------|----------------------|---------------------|---------------------------------|-----------------------------------|
| <b>[Euarchontoglires]</b>       |                    |                      |                     |                                 |                                   |
| <i>Homo sapiens</i>             | Primate            | NCBI (BUILD.37.2)    | -                   | 388 (414) <sup>c</sup>          | 6 (3)                             |
| <i>Mus musculus</i>             | Rodentia           | NCBI (BUILD.38.1)    | -                   | 1063 (328) <sup>c</sup>         | 15 (1)                            |
| <i>Rattus norvegicus</i>        | Rodentia           | NCBI (BUILD.4.1)     | -                   | 1259 (508) <sup>c</sup>         | 17 (2)                            |
| <b>[Laurasiatheria]</b>         |                    |                      |                     |                                 |                                   |
| <i>Bos taurus</i>               | Cetartiodactyla    | BC                   | 7.1×                | 970 (1159) <sup>c</sup>         | 21 (8)                            |
| <i>Tursiops truncatus</i>       | Cetacea            | BI                   | 2.59×               | 26 <sup>c</sup>                 | 0 (3)                             |
| <i>Equus caballus</i>           | Perissodactyla     | BI                   | 6.79×               | NA                              | 11 (4)                            |
| <i>Canis familiaris</i>         | Carnivora          | BI                   | 7.6×                | 822 (278) <sup>c</sup>          | 2 (2)                             |
| <i>Pteropus vampyrus</i>        | Chiroptera         | BI                   | 2.63×               | 672 <sup>d</sup>                | 26 (10)                           |
| <i>Myotis lucifugus</i>         | Chiroptera         | BI                   | 1.84×               | 659 <sup>d</sup>                | 6 (1)                             |
| <i>Sorex araneus</i>            | Insectivora        | BI                   | 1.92×               | NA                              | 9 [1] (3)                         |
| <i>Erinaceus europaeus</i>      | Insectivora        | BI                   | 1.86×               | NA                              | 6 [2] (4)                         |
| <b>[Afrotheria]</b>             |                    |                      |                     |                                 |                                   |
| <i>Echinops telfairi</i>        | Afrosoricida       | BI                   | 1.90×               | NA                              | 9 [1] (7)                         |
| <i>Loxodonta africana</i>       | Proboscidea        | BI                   | 1.94×               | NA                              | 9 [3] (3)                         |
| <b>[Xenarthra]</b>              |                    |                      |                     |                                 |                                   |
| <i>Dasylops novemcinctus</i>    | Cingulata          | WU                   | 2.11×               | NA                              | 5 (4)                             |
| <b>[Marsupialia]</b>            |                    |                      |                     |                                 |                                   |
| <i>Macropus eugenii</i>         | Diprotodontia      | Ens                  | 2.0×                | NA                              | 18 [1] (3)                        |
| <i>Monodelphis domestica</i>    | Didelphimorphia    | BI                   | 6.8×                | 1198 (294) <sup>c</sup>         | 22 (4)                            |
| <b>[Prototheria]</b>            |                    |                      |                     |                                 |                                   |
| <i>Ornithorhynchus anatinus</i> | Monotremata        | WU                   | 6.0×                | 348 (370) <sup>c</sup>          | 4 (1)                             |
| <b>[Sauropsida]</b>             |                    |                      |                     |                                 |                                   |
| <i>Gallus gallus</i>            | Galliformes        | WU                   | 6.6×                | 211 [89] (133) <sup>e</sup>     | 4 (1)                             |
| <i>Taeniopygia guttata</i>      | Passeriformes      | WU                   | 6.3×                | NA                              | 1 (0)                             |
| <i>Anolis carolinensis</i>      | Squamata           | BI                   | 6.3×                | 112 [4] (30) <sup>e</sup>       | 3 (0)                             |
| <b>[Amphibia]</b>               |                    |                      |                     |                                 |                                   |
| <i>Xenopus tropicalis</i>       | Anura              | JGI                  | 7.65×               | 824 [200] (614) <sup>e</sup>    | 7 (0)                             |
| <b>[Teleostei]</b>              |                    |                      |                     |                                 |                                   |
| <i>Takifugu rubripes</i>        | Tetraodontiformes  | IMC                  | 8.7×                | 47 [39] (39) <sup>e</sup>       | 18 (1)                            |
| <i>Tetraodon nigroviridis</i>   | Tetraodontiformes  | Gen                  | 8.2×                | 11 [4] (19) <sup>e</sup>        | 34 (3)                            |
| <i>Danio rerio</i>              | Cypriniformes      | -                    | -                   | 154 [1] (21) <sup>e</sup>       | 110 (10) <sup>g</sup>             |
| <b>[Chondrichthyes]</b>         |                    |                      |                     |                                 |                                   |
| <i>Callorhynchus milii</i>      | Chimaeriformes     | IMC                  | 1.4×                | 1 [1] (0) <sup>e</sup>          | 2 (3)                             |
| <b>[Agnatha]</b>                |                    |                      |                     |                                 |                                   |
| <i>Petromyzon marinus</i>       | Petromyzontiformes | UCSC                 | Ver.2               | 32 [8] (27) <sup>e</sup>        | 25 (3)                            |
| <b>[Cephalochordata]</b>        |                    |                      |                     |                                 |                                   |
| <i>Branchiostoma floridae</i>   | Amphioxiformes     | JGI                  | 8.1×                | 31 [3] (9) <sup>e</sup>         | 0                                 |
| <b>[Urochordata]</b>            |                    |                      |                     |                                 |                                   |
| <i>Ciona intestinalis</i>       | Enterogona         | JGI                  | 11×                 | 0 (0) <sup>e</sup>              | 0                                 |
| <i>Ciona savignyi</i>           | Enterogona         | ASL (v2.1)           | -                   | 0 (0) <sup>e</sup>              | 0                                 |
| <b>[Cnidaria]</b>               |                    |                      |                     |                                 |                                   |
| <i>Nematostella vectensis</i>   | Actiniaria         | JGI                  | 7.8×                | 45 <sup>f</sup>                 | 0                                 |

<sup>a</sup>Data source abbreviations. ASL: the Arend Sidow Lab at Stanford University (<http://mendel.stanford.edu/sidowlab/ciona.html>), BC: Baylor College of Medicine Human Genome Sequencing Center (<http://www.hgsc.bcm.tmc.edu>), BI: Broad Institute at MIT (<http://www.broad.mit.edu>), Ens: Ensembl Genome Browser (<http://www.ensembl.org>), Gen: Genoscope (<http://www.genoscope.cns.fr>), IMC: the Institute of Molecular and Cellular Biology (<http://www.imcb.a-star.edu.sg>), JGI: the Joint Genome Institute (<http://www.jgi.doe.gov>), NCBI: National Center for Biotechnology Information (<http://www.ncbi.nlm.nih.gov>), WU: the Genome Sequencing Center at Washington University School of Medicine (<http://genome.wustl.edu>), and UCSC the University of California-San Cruz (UCSC) Genome Browser (<http://genome.ucsc.edu/>).

<sup>b</sup>Gene candidates are divided into three categories: intact, incomplete, and pseudogenes. See Table 1 for the details.

<sup>c-g</sup>The numbers were taken from the following literatures: Nei *et al.* (2008)<sup>c</sup>, Hayden *et al.* (2010)<sup>d</sup>, Niimura (2009)<sup>e</sup>, Churcher and Taylor (2011)<sup>f</sup>, and Hashiguchi and Nishida (2007)<sup>g</sup>.

NA: not available.

## References:

- Churcher AM, Taylor JS. 2011. The Antiquity of Chordate Odorant Receptors Is Revealed by the Discovery of Orthologs in the Cnidarian *Nematostella vectensis*. *Genome Biol Evol.* 3:36-43.
- Hashiguchi Y, Nishida M. 2007. Evolution of Trace Amine-Associated Receptor (TAAR) Gene Family in Vertebrates: Lineage-specific Expansions and Degradations of a Second Class of Vertebrate Chemosensory Receptors Expressed in the Olfactory Epithelium. *Mol Biol Evol.* 24:2099–2107.
- Hayden S, Bekaert M, Crider TA, Mariani S, Murphy WJ, Teeling EC. 2010. Ecological adaptation determines functional mammalian olfactory subgenomes. *Genome Res.* 20:1-9.
- Nei M, Niimura Y, Nozawa M. 2008. The evolution of animal chemosensory receptor gene repertoires: roles of chance and necessity. *Nat Rev Genet.* 9:951-963.
- Niimura Y. 2009. On the Origin and Evolution of Vertebrate Olfactory Receptor Genes: Comparative Genome Analysis Among 23 Chordate Species. *Genome Biol Evol.* 2009:34-44.
