# Supplementary material for: Molecular Evolution and Functional Divergence of Trace Amine–Associated Receptors
Source: PubMed Central journal article supplement (PMC4786312; doi:10.1371/journal.pone.0151023), 2016-03-10
Supplement: pone.0151023.s011.pdf [file pone.0151023.s011.pdf]

**S4 Table. The results of PAML branch-site model analysis.<sup>a</sup>**

| TAAR subfamily <sup>b</sup> | Foreground branch            | $2\Delta\ln L^c$                 | Proportion of site class                                  | $\omega$                                                       | Positively selected sites <sup>d</sup>                            |
|-----------------------------|------------------------------|----------------------------------|-----------------------------------------------------------|----------------------------------------------------------------|-------------------------------------------------------------------|
| TAAR7<br>(45)               | flying fox<br>TAAR7c         | 3.9934<br>(0.0457)               | 0: 0.68747,<br>1: 0.29542,<br>2a: 0.01197,<br>2b: 0.00514 | $\omega_0=0.11593$ ,<br>$\omega_1=1$ ,<br>$\omega_2=140.19823$ | A162 (0.657), I184 (0.599)                                        |
| TAAR7<br>(45)               | tenrec-<br>elephant<br>TAAR7 | <b>7.2427</b><br><b>(0.0071)</b> | 0: 0.69211,<br>1: 0.29130,<br>2a: 0.01167,<br>2b: 0.00491 | $\omega_0=0.11524$ ,<br>$\omega_1=1$ ,<br>$\omega_2=169.33093$ | S161 (0.581), S177 (0.522),<br><b>S188<sup>5,36</sup> (0.973)</b> |
| TAAR8<br>(16)               | mouse<br>TAAR8a              | 6.0053<br>(0.0142)               | 0: 0.82235,<br>1: 0.17302,<br>2a: 0.00383,<br>2b: 0.00081 | $\omega_0=0.14625$ ,<br>$\omega_1=1$ ,<br>$\omega_2=777.9954$  | F190 <sup>5,38</sup> (0.935)                                      |

<sup>a</sup>Only the results where the given foreground branch having positive selection is supported significantly are listed. These branches are indicated with red color and arrows in Fig 2.

<sup>b</sup>The number of the TAAR subfamily genes tested is given in parentheses.

<sup>c</sup>Likelihood-ratio test statistics. *P*-values (shown in parentheses) are obtained based on a  $\chi^2$  distribution with d.f. = 1. *P*-values smaller than 0.01 are shown in boldfaces.

<sup>d</sup>Positively selected amino acid sites using the Bayes Empirical Bayes inference. Posterior probabilities are shown in parentheses, in boldfaces when *P* > 0.95. The position numbers are based on the alignment in S5 Fig. The numbering of the Ballesteros-Weinstein scheme (Ballesteros and Weinstein 1995) is shown in superscripts.

#### References:

Ballesteros JA, Weinstein H. 1995. Integrated methods for the construction of three-dimensional models and computational probing of structure-function relations in G protein-coupled receptors. In: CS Stuart, editor. Receptor Molecular Biology: Academic Press. p. 366-428.
